# Supplementary material for: Systematic review of clinical effectiveness, components, and delivery of pulmonary rehabilitation in low-resource settings
Source: PubMed Central journal article supplement (PMC7677536; doi:10.1038/s41533-020-00210-y), 2020-11-19
Supplement: 41533_2020_210_MOESM1_ESM.pdf [file 41533_2020_210_MOESM1_ESM.pdf]

## Supplementary methods 1. Medline search strategy

| SI | Searches of MEDLINE on 28 Oct. 18                                                                                                                                                                                                                                                                                                                                                                                                                                                                                                                                                                                                                                                                                                                                                                                                                                  | Results |
|----|--------------------------------------------------------------------------------------------------------------------------------------------------------------------------------------------------------------------------------------------------------------------------------------------------------------------------------------------------------------------------------------------------------------------------------------------------------------------------------------------------------------------------------------------------------------------------------------------------------------------------------------------------------------------------------------------------------------------------------------------------------------------------------------------------------------------------------------------------------------------|---------|
| 1  | exp Lung Diseases, Obstructive/                                                                                                                                                                                                                                                                                                                                                                                                                                                                                                                                                                                                                                                                                                                                                                                                                                    | 197888  |
| 2  | pulmonary disease, chronic obstructive.mp. or exp Pulmonary Disease, Chronic Obstructive/                                                                                                                                                                                                                                                                                                                                                                                                                                                                                                                                                                                                                                                                                                                                                                          | 49651   |
| 3  | emphysema\$.mp.                                                                                                                                                                                                                                                                                                                                                                                                                                                                                                                                                                                                                                                                                                                                                                                                                                                    | 31795   |
| 4  | (Chronic\$ adj3 bronchiti\$).mp.                                                                                                                                                                                                                                                                                                                                                                                                                                                                                                                                                                                                                                                                                                                                                                                                                                   | 10714   |
| 5  | (obstruct\$ adj3 (pulmonary or lung\$ or airway\$ or airflow\$ or bronch\$ or respirat\$)).mp.                                                                                                                                                                                                                                                                                                                                                                                                                                                                                                                                                                                                                                                                                                                                                                     | 98543   |
| 6  | COPD.mp.                                                                                                                                                                                                                                                                                                                                                                                                                                                                                                                                                                                                                                                                                                                                                                                                                                                           | 34381   |
| 7  | COAD.mp.                                                                                                                                                                                                                                                                                                                                                                                                                                                                                                                                                                                                                                                                                                                                                                                                                                                           | 222     |
| 8  | COBD.mp.                                                                                                                                                                                                                                                                                                                                                                                                                                                                                                                                                                                                                                                                                                                                                                                                                                                           | 12      |
| 9  | AECB.mp.                                                                                                                                                                                                                                                                                                                                                                                                                                                                                                                                                                                                                                                                                                                                                                                                                                                           | 210     |
| 10 | (obstruct* adj3 (pulmonary or lung* or airway* or airflow* or bronch* or respirat*)).mp.                                                                                                                                                                                                                                                                                                                                                                                                                                                                                                                                                                                                                                                                                                                                                                           | 98543   |
| 11 | AECOPD.mp.                                                                                                                                                                                                                                                                                                                                                                                                                                                                                                                                                                                                                                                                                                                                                                                                                                                         | 630     |
| 12 | exp chronic bronchitis/                                                                                                                                                                                                                                                                                                                                                                                                                                                                                                                                                                                                                                                                                                                                                                                                                                            | 1688    |
| 13 | 1 or 2 or 3 or 4 or 5 or 6 or 7 or 8 or 9 or 10 or 11 or 12                                                                                                                                                                                                                                                                                                                                                                                                                                                                                                                                                                                                                                                                                                                                                                                                        | 252449  |
| 14 | REHABILITATION.mp. or exp REHABILITATION/                                                                                                                                                                                                                                                                                                                                                                                                                                                                                                                                                                                                                                                                                                                                                                                                                          | 459193  |
| 15 | Respiratory Therapy.mp. or exp Respiratory Therapy/                                                                                                                                                                                                                                                                                                                                                                                                                                                                                                                                                                                                                                                                                                                                                                                                                | 106770  |
| 16 | Physical Therapy Modalities.mp. or exp Physical Therapy Modalities/                                                                                                                                                                                                                                                                                                                                                                                                                                                                                                                                                                                                                                                                                                                                                                                                | 138907  |
| 17 | (rehabilitat* or fitness* or exercis* or train* or physiotherap* or (physical* adj therap*)).mp.                                                                                                                                                                                                                                                                                                                                                                                                                                                                                                                                                                                                                                                                                                                                                                   | 968222  |
| 18 | 14 or 15 or 16 or 17                                                                                                                                                                                                                                                                                                                                                                                                                                                                                                                                                                                                                                                                                                                                                                                                                                               | 1197761 |
| 19 | (Africa or Asia or Caribbean or "West Indies" or "South America" or "Latin America" or "Central America").mp.                                                                                                                                                                                                                                                                                                                                                                                                                                                                                                                                                                                                                                                                                                                                                      | 220128  |
| 20 | (Afghanistan or Albania or Algeria or Angola or Antigua or Barbuda or Argentina or Armenia or Armenian or Aruba or Azerbaijan or Bahrain or Bangladesh or Barbados or Benin or Byelarus or Byelorussian or Belarus or Belorussian or Belorussia or Belize or Bhutan or Bolivia or Bosnia or Herzegovina or Hercegovina or Botswana or Brasil or Brazil or Bulgaria or "Burkina Faso" or "Burkina Fasso" or "Upper Volta" or Burundi or Urundi or Cambodia or "Khmer Republic" or Kampuchea or Cameroon or Cameroons or Cameron or Camerons or "Cape Verde" or "Central African Republic" or Chad or Chile or China or Colombia or Comoros or "Comoro Islands" or Comores or Mayotte or Congo or Zaire or "Costa Rica" or "Cote d'Ivoire" or "Ivory Coast" or Croatia or Cuba or Cyprus or Czechoslovakia or "Czech Republic" or Slovakia or "Slovak Republic").mp. | 436693  |
| 21 | (Djibouti or "French Somaliland" or Dominica or "Dominican Republic" or "East Timor" or "East Timur" or "Timor Leste" or Ecuador or Egypt or "United Arab Republic" or "El Salvador" or Eritrea or Estonia or Ethiopia or Fiji or Gabon or "Gabonese Republic" or Gambia or Gaza or Georgia or Georgian or Ghana or "Gold Coast" or Greece or Grenada or Guatemala or Guinea or Guam or Guiana or Guyana or Haiti or Honduras or Hungary or India or Maldives or Indonesia or Iran or Iraq or "Isle of Man" or Jamaica or                                                                                                                                                                                                                                                                                                                                          | 516935  |

|    |                                                                                                                                                                                                                                                                                                                                                                                                                                                                                                                                                                                                                                                                                                                                                                                                                                                                                                                                                                                  |         |
|----|----------------------------------------------------------------------------------------------------------------------------------------------------------------------------------------------------------------------------------------------------------------------------------------------------------------------------------------------------------------------------------------------------------------------------------------------------------------------------------------------------------------------------------------------------------------------------------------------------------------------------------------------------------------------------------------------------------------------------------------------------------------------------------------------------------------------------------------------------------------------------------------------------------------------------------------------------------------------------------|---------|
|    | Jordan or Kazakhstan or Kazakh or Kenya or Kiribati or Korea or Kosovo or Kyrgyzstan or Kirghizia or "Kyrgyz Republic" or Kirghiz or Kirgizstan or "Lao PDR" or Laos or Latvia or Lebanon or Lesotho or Basutoland or Liberia or Libya or Lithuania).mp.                                                                                                                                                                                                                                                                                                                                                                                                                                                                                                                                                                                                                                                                                                                         |         |
| 22 | (Macedonia or Madagascar or "Malagasy Republic" or Malaysia or Malaya or Malay or Sabah or Sarawak or Malawi or Nyasaland or Mali or Malta or "Marshall Islands" or Mauritania or Mauritius or "Agalega Islands" or Mexico or Micronesia or "Middle East" or Moldova or Moldavia or Moldovan or Mongolia or Montenegro or Morocco or Ifni or Mozambique or Myanmar or Myanma or Burma or Namibia or Nepal or "Netherlands Antilles" or "New Caledonia" or Nicaragua or Niger or Nigeria or "Northern Mariana Islands" or Oman or Muscat or Pakistan or Palau or Palestine or Panama or Paraguay or Peru or Philippines or Philipines or Phillipines or Phillippines or Poland or Portugal or "Puerto Rico").mp.                                                                                                                                                                                                                                                                  | 274812  |
| 23 | (Romania or Rumania or Roumania or Russia or Russian or Rwanda or Ruanda or "Saint Kitts" or "St Kitts" or Nevis or "Saint Lucia" or "St Lucia" or "Saint Vincent" or "St Vincent" or Grenadines or Samoa or "Samoan Islands" or "Navigator Island" or "Navigator Islands" or "Sao Tome" or "Saudi Arabia" or Senegal or Serbia or Montenegro or Seychelles or "Sierra Leone" or Slovenia or "Sri Lanka" or Ceylon or "Solomon Islands" or Somalia or Sudan or Suriname or Surinam or Swaziland or Syria or Tajikistan or Tadjhikistan or Tadjikistan or Tadjhik or Tanzania or Thailand or Togo or "Togolese Republic" or Tonga or Trinidad or Tobago or Tunisia or Turkey or Turkmenistan or Turkmen or Uganda or Ukraine or Uruguay or USSR or "Soviet Union" or "Union of Soviet Socialist Republics" or Uzbekistan or Uzbek or Vanuatu or "New Hebrides" or Venezuela or Vietnam or "Viet Nam" or "West Bank" or Yemen or Yugoslavia or Zambia or Zimbabwe or Rhodesia).mp. | 328981  |
| 24 | ((developing or "less* developed" or "under developed" or underdeveloped or "middle income" or "low* income" or underserved or "under served" or deprived or poor*) adj (countr* or nation* or population* or world)).mp.                                                                                                                                                                                                                                                                                                                                                                                                                                                                                                                                                                                                                                                                                                                                                        | 127486  |
| 25 | ((developing or "less* developed" or "under developed" or underdeveloped or "middle income" or "low* income") adj (economy or economies)).mp.                                                                                                                                                                                                                                                                                                                                                                                                                                                                                                                                                                                                                                                                                                                                                                                                                                    | 351     |
| 26 | (low* adj (GDP or GNP or "gross domestic" or "gross national")).mp.                                                                                                                                                                                                                                                                                                                                                                                                                                                                                                                                                                                                                                                                                                                                                                                                                                                                                                              | 203     |
| 27 | (low adj3 middle adj3 countr*).mp.                                                                                                                                                                                                                                                                                                                                                                                                                                                                                                                                                                                                                                                                                                                                                                                                                                                                                                                                               | 8403    |
| 28 | (LMIC or LMICs or "third world" or "LAMI country" or "LAMI countries").mp.                                                                                                                                                                                                                                                                                                                                                                                                                                                                                                                                                                                                                                                                                                                                                                                                                                                                                                       | 4711    |
| 29 | ("transitional country" or "transitional countries").mp.                                                                                                                                                                                                                                                                                                                                                                                                                                                                                                                                                                                                                                                                                                                                                                                                                                                                                                                         | 131     |
| 30 | (setting* adj2 (resource* or poor* or constrain* or low*)).mp.                                                                                                                                                                                                                                                                                                                                                                                                                                                                                                                                                                                                                                                                                                                                                                                                                                                                                                                   | 12989   |
| 31 | 19 or 20 or 21 or 22 or 23 or 24 or 25 or 26 or 27 or 28 or 29 or 30                                                                                                                                                                                                                                                                                                                                                                                                                                                                                                                                                                                                                                                                                                                                                                                                                                                                                                             | 1629217 |
| 32 | 13 and 18 and 31                                                                                                                                                                                                                                                                                                                                                                                                                                                                                                                                                                                                                                                                                                                                                                                                                                                                                                                                                                 | 1370    |

## Supplementary methods 2. Piloted data extraction form

Notes on using this data extraction form:

- Be consistent in the order and style used to describe the information for each included study
- Record any missing information as unclear or not described, to make it clear that the information was not found in the study report
- Include any instructions and decision rules on the data collection form, or in an accompanying document.

|                                                                                               |  |
|-----------------------------------------------------------------------------------------------|--|
| Study ID ( <i>surname of first author and year first full report of study was published</i> ) |  |
| Notes:                                                                                        |  |

### 1. General information

|                                                                      |  |
|----------------------------------------------------------------------|--|
| Date of data extraction( <i>dd/mm/yyyy</i> )                         |  |
| Name of reviewer                                                     |  |
| Article title                                                        |  |
| Reference ( <i>journal, year, volume, issue, pages</i> )             |  |
| Country of origin                                                    |  |
| Type of publication ( <i>e.g. full report, conference abstract</i> ) |  |
| Notes:                                                               |  |

### 2. Specific information

|                                                           |                                                           |
|-----------------------------------------------------------|-----------------------------------------------------------|
| Aim of study ( <i>process &amp; clinical objectives</i> ) |                                                           |
| Study design                                              | <input type="checkbox"/> RCT <input type="checkbox"/> CCT |
| Start date                                                |                                                           |
| End date                                                  |                                                           |
| Duration of participation                                 |                                                           |
| Number of centre(s) in study                              |                                                           |
| Notes:                                                    |                                                           |

### Population and setting

|                                                                                         |                                                                                                                                                                                                                              |
|-----------------------------------------------------------------------------------------|------------------------------------------------------------------------------------------------------------------------------------------------------------------------------------------------------------------------------|
| Health condition targeted                                                               | <input type="checkbox"/> COPD <input type="checkbox"/> Post TB <input type="checkbox"/> Remodelled asthma <input type="checkbox"/> Bronchiectasis <input type="checkbox"/> ILD <input type="checkbox"/> Undifferentiated CRD |
| Source/ setting of the population ( <i>e.g. urban, rural, particular ethnic group</i> ) |                                                                                                                                                                                                                              |
| Setting                                                                                 |                                                                                                                                                                                                                              |
| Notes:                                                                                  |                                                                                                                                                                                                                              |

| <b>Patients</b>                                          |  |
|----------------------------------------------------------|--|
| Inclusion criteria                                       |  |
| Exclusion criteria                                       |  |
| Recruitment procedures used                              |  |
| Number recruited                                         |  |
| Number randomised                                        |  |
| Number completed                                         |  |
| Age                                                      |  |
| Sex                                                      |  |
| Other relevant characteristics ( <i>please specify</i> ) |  |
| Notes:                                                   |  |

### Intervention & Control

| <b>Level 1: Components of PR</b>            |                                                                                                                                                                        |
|---------------------------------------------|------------------------------------------------------------------------------------------------------------------------------------------------------------------------|
| Intervention summary                        | the Department of Pulmonary Medicine supervised the activities.                                                                                                        |
| Components of PR                            | <input type="checkbox"/> xxxxx<br><input type="checkbox"/> xxxxx<br><input type="checkbox"/> xxxxx<br><input type="checkbox"/> xxxxx<br><input type="checkbox"/> other |
| <b>Level2: Models of service delivery</b>   |                                                                                                                                                                        |
| Brief name                                  |                                                                                                                                                                        |
| Why: rationale/theory/goal                  |                                                                                                                                                                        |
| What: physical/informational materials used |                                                                                                                                                                        |
| What: procedures/activities/processes used  |                                                                                                                                                                        |

|                                                                  |                                                                                                                                                                                                                                                                                                                                                                                                                                                                                                                                                                                                                                                                                                                                                                                                                                                                                                                                                                                |
|------------------------------------------------------------------|--------------------------------------------------------------------------------------------------------------------------------------------------------------------------------------------------------------------------------------------------------------------------------------------------------------------------------------------------------------------------------------------------------------------------------------------------------------------------------------------------------------------------------------------------------------------------------------------------------------------------------------------------------------------------------------------------------------------------------------------------------------------------------------------------------------------------------------------------------------------------------------------------------------------------------------------------------------------------------|
| Who: provider(s), expertise, background, training                |                                                                                                                                                                                                                                                                                                                                                                                                                                                                                                                                                                                                                                                                                                                                                                                                                                                                                                                                                                                |
| How: modes of delivery                                           | <input type="checkbox"/> face-to-face <input type="checkbox"/> telephone <input type="checkbox"/> internet <input type="checkbox"/> video/DVD <input type="checkbox"/> written materials <input type="checkbox"/> other ( <i>specify</i> )<br><br>individual <input type="checkbox"/> group <input type="checkbox"/>                                                                                                                                                                                                                                                                                                                                                                                                                                                                                                                                                                                                                                                           |
| Where: type(s) of location(s) where intervention occurred        |                                                                                                                                                                                                                                                                                                                                                                                                                                                                                                                                                                                                                                                                                                                                                                                                                                                                                                                                                                                |
| When and How Much                                                | number of sessions:<br>session schedule:<br>session duration:                                                                                                                                                                                                                                                                                                                                                                                                                                                                                                                                                                                                                                                                                                                                                                                                                                                                                                                  |
| Tailoring ( <i>if applicable: what, why, when, and how</i> )     |                                                                                                                                                                                                                                                                                                                                                                                                                                                                                                                                                                                                                                                                                                                                                                                                                                                                                                                                                                                |
| Modifications ( <i>if applicable: what, why, when, and how</i> ) |                                                                                                                                                                                                                                                                                                                                                                                                                                                                                                                                                                                                                                                                                                                                                                                                                                                                                                                                                                                |
| How Well: intervention adherence/ fidelity assessment methods    |                                                                                                                                                                                                                                                                                                                                                                                                                                                                                                                                                                                                                                                                                                                                                                                                                                                                                                                                                                                |
| How Well: intervention adherence/ fidelity assessment results    |                                                                                                                                                                                                                                                                                                                                                                                                                                                                                                                                                                                                                                                                                                                                                                                                                                                                                                                                                                                |
| Notes:                                                           |                                                                                                                                                                                                                                                                                                                                                                                                                                                                                                                                                                                                                                                                                                                                                                                                                                                                                                                                                                                |
| <b>Level 3: Implementation strategies</b>                        |                                                                                                                                                                                                                                                                                                                                                                                                                                                                                                                                                                                                                                                                                                                                                                                                                                                                                                                                                                                |
| Type of intervention ( <i>EPOC TAXONOMY</i> )                    | <input type="checkbox"/> audit & feedback<br><input type="checkbox"/> clinical incident reporting<br><input type="checkbox"/> monitoring the performance of the delivery of healthcare<br><input type="checkbox"/> communities of practice<br><input type="checkbox"/> continuous quality improvement<br><input type="checkbox"/> educational games<br><input type="checkbox"/> educational materials<br><input type="checkbox"/> educational meetings<br><input type="checkbox"/> educational outreach visits/academic detailing<br><input type="checkbox"/> clinical practice guidelines<br><input type="checkbox"/> inter-professional education<br><input type="checkbox"/> local consensus processes<br><input type="checkbox"/> local opinion leaders<br><input type="checkbox"/> managerial supervision<br><input type="checkbox"/> patient-mediated interventions<br><input type="checkbox"/> public release of performance data<br><input type="checkbox"/> reminders |

|  |                                                                                                                       |
|--|-----------------------------------------------------------------------------------------------------------------------|
|  | <input type="checkbox"/> routine patient-reported outcome measures<br><input type="checkbox"/> tailored interventions |
|--|-----------------------------------------------------------------------------------------------------------------------|

| <b>Outcomes</b>                         |                          |
|-----------------------------------------|--------------------------|
| <b>Primary</b>                          |                          |
| Functional exercise capacity            | <input type="checkbox"/> |
| Health-Related Quality of Life (HRQoL)  | <input type="checkbox"/> |
| <b>Secondary</b>                        |                          |
| Symptom control                         | <input type="checkbox"/> |
| Psychological status                    | <input type="checkbox"/> |
| Health care burden                      | <input type="checkbox"/> |
| Uptake of the service, completion rates | <input type="checkbox"/> |
| Adverse effects                         | <input type="checkbox"/> |

| Full primary outcome description | Method(s) of measurement | Time points measured (e.g. 6 months) | Time points reported (e.g. 6 months) |
|----------------------------------|--------------------------|--------------------------------------|--------------------------------------|
| Functional exercise capacity     |                          |                                      |                                      |
| HRQoL                            |                          |                                      |                                      |
| Notes:                           |                          |                                      |                                      |

| Full secondary outcome description | Method(s) of measurement | Time points measured (e.g. 6 months) | Time points reported (e.g. 6 months) |
|------------------------------------|--------------------------|--------------------------------------|--------------------------------------|
| Symptom control                    |                          |                                      |                                      |
| Notes:                             |                          |                                      |                                      |

| <b>Analysis</b>                                                                           |  |
|-------------------------------------------------------------------------------------------|--|
| Sample size/power calculation                                                             |  |
| Method(s) of analysis ( <i>statistical analysis and approach, e.g. ITT/per protocol</i> ) |  |
| Missing data and how addressed                                                            |  |
| Drop-out rate                                                                             |  |
| Notes:                                                                                    |  |

### Results

|                                    |
|------------------------------------|
| <a href="#">Complete Excel Doc</a> |
| Notes:                             |

|  |
|--|
|  |
|--|

### 3. Other information

|                                      |  |
|--------------------------------------|--|
| Limitations                          |  |
| Key conclusions of study authors     |  |
| Generalisability                     |  |
| Potentially relevant references      |  |
| Funding                              |  |
| Ethical approval                     |  |
| Corresponding author contact details |  |
| Other                                |  |
| Notes:                               |  |

### 4. Risk of bias assessment

Source: Higgins JPT, Green S (editors). *Cochrane Handbook for Systematic Reviews of Interventions*. Version 5.1.0 [updated March 2011]. The Cochrane Collaboration, 2011. Available at: [www.cochrane-handbook.org](http://www.cochrane-handbook.org)

See guidance notes.

| Domain                                                              | Risk of bias             |                          |                          |                          | Support for judgment |
|---------------------------------------------------------------------|--------------------------|--------------------------|--------------------------|--------------------------|----------------------|
|                                                                     | Low                      | High                     | Unclear                  | Not applicable           |                      |
| Random sequence generation<br><i>(selection bias)</i>               | <input type="checkbox"/> | <input type="checkbox"/> | <input type="checkbox"/> | <input type="checkbox"/> |                      |
| Allocation concealment<br><i>(selection bias)</i>                   | <input type="checkbox"/> | <input type="checkbox"/> | <input type="checkbox"/> | <input type="checkbox"/> |                      |
| Blinding of participants and personnel<br><i>(performance bias)</i> | <input type="checkbox"/> | <input type="checkbox"/> | <input type="checkbox"/> | <input type="checkbox"/> |                      |
| Blinding of outcome assessment<br><i>(detection bias)</i>           | <input type="checkbox"/> | <input type="checkbox"/> | <input type="checkbox"/> | <input type="checkbox"/> |                      |
| Incomplete outcome data<br><i>(attrition bias)</i>                  | <input type="checkbox"/> | <input type="checkbox"/> | <input type="checkbox"/> | <input type="checkbox"/> |                      |
| Selective outcome reporting<br><i>(reporting bias)</i>              | <input type="checkbox"/> | <input type="checkbox"/> | <input type="checkbox"/> | <input type="checkbox"/> |                      |
| Other bias                                                          | <input type="checkbox"/> | <input type="checkbox"/> | <input type="checkbox"/> | <input type="checkbox"/> |                      |
| Overall risk of bias                                                | <input type="checkbox"/> | <input type="checkbox"/> | <input type="checkbox"/> | <input type="checkbox"/> |                      |
| Notes:                                                              |                          |                          |                          |                          |                      |

Supplementary results 1. Risk of Bias assessment

| Article              | Random | Concealed | Personnel blinded | Outcomes blinded | Attrition | Selective reporting | Other bias | Overall |
|----------------------|--------|-----------|-------------------|------------------|-----------|---------------------|------------|---------|
| Akinci 2011          |        |           |                   |                  |           |                     |            |         |
| de Grass 2014        |        |           |                   |                  |           |                     |            |         |
| Deepak 2014          |        |           |                   |                  |           |                     |            |         |
| De Souto Araujo 2012 |        |           |                   |                  |           |                     |            |         |
| Duruturk 2015        |        |           |                   |                  |           |                     |            |         |
| Elci 2008            |        |           |                   |                  |           |                     |            |         |
| Farias 2014          |        |           |                   |                  |           |                     |            |         |
| Ghanem 2010          |        |           |                   |                  |           |                     |            |         |
| Karapolat 2007       |        |           |                   |                  |           |                     |            |         |
| Mohammadi 2013       |        |           |                   |                  |           |                     |            |         |
| Paz-Diaz 2007        |        |           |                   |                  |           |                     |            |         |
| Pradella 2015        |        |           |                   |                  |           |                     |            |         |
| Singh 2003           |        |           |                   |                  |           |                     |            |         |

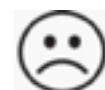

High risk

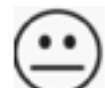

Moderate risk

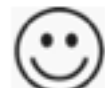

Low risk



## Supplementary results 2. GRADE assessment

| <b>Clinical effectiveness and models of care of Low-Resource Pulmonary Rehabilitation</b>                                           |                                          |                          |                          |                                       |                                 |                                                                                                                                                                                                                                                                                               |
|-------------------------------------------------------------------------------------------------------------------------------------|------------------------------------------|--------------------------|--------------------------|---------------------------------------|---------------------------------|-----------------------------------------------------------------------------------------------------------------------------------------------------------------------------------------------------------------------------------------------------------------------------------------------|
| <b>Population:</b> Adults with Chronic Respiratory Diseases including undiagnosed condition that cause chronic respiratory symptoms |                                          |                          |                          |                                       |                                 |                                                                                                                                                                                                                                                                                               |
| <b>Intervention:</b> Pulmonary Rehabilitation                                                                                       |                                          |                          |                          |                                       |                                 |                                                                                                                                                                                                                                                                                               |
| <b>Settings:</b> Low-resource settings                                                                                              |                                          |                          |                          |                                       |                                 |                                                                                                                                                                                                                                                                                               |
| <b>Comparison:</b> Usual care                                                                                                       |                                          |                          |                          |                                       |                                 |                                                                                                                                                                                                                                                                                               |
| Outcomes                                                                                                                            | Illustrative comparative risks* (95% CI) |                          | Relative effect (95% CI) | No of Participants (studies involved) | Quality of the evidence (GRADE) | Comments                                                                                                                                                                                                                                                                                      |
|                                                                                                                                     | Assumed risk                             | Corresponding risk       |                          |                                       |                                 |                                                                                                                                                                                                                                                                                               |
|                                                                                                                                     | Usual care                               | Pulmonary rehabilitation |                          |                                       |                                 |                                                                                                                                                                                                                                                                                               |
| <b>Functional exercise capacity</b>                                                                                                 | See comment                              | See comment              | Not estimable            | 509 (11)                              | See comment                     | The effect is uncertain. Nine of the studies had high risk of bias and two had moderate risk of bias. All the studies did not have same scale of outcome measurement. Four studies measured effectiveness by between group comparison whereas seven studies measured within group comparison. |
| <b>Health-Related Quality of Life</b>                                                                                               | See comment                              | See comment              | Not estimable            | 506(12)                               | See comment                     | The effect is uncertain. Eleven of the studies had high risk of bias and one had moderate                                                                                                                                                                                                     |

|                       |             |             |               |         |             |                                                                                                                                                                                                                                                                                                      |
|-----------------------|-------------|-------------|---------------|---------|-------------|------------------------------------------------------------------------------------------------------------------------------------------------------------------------------------------------------------------------------------------------------------------------------------------------------|
|                       |             |             |               |         |             | <p>risk of bias. All the studies did not have same scale of outcome measurement. Five studies measured effectiveness by between group comparison whereas seven studies measured within group comparison.</p>                                                                                         |
| <b>Breathlessness</b> | See comment | See comment | Not estimable | 455(11) | See comment | <p>The effect is uncertain. Nine of the studies had high risk of bias and two had moderate risk of bias. All the studies did not have same scale of outcome measurement. Four studies measured effectiveness by between group comparison whereas seven studies measured within group comparison.</p> |
